# Supplementary material
Source: Springer Nature journal article supplement (https://www.springermedizin.de/resource/supplementary/12974_2009_236_MOESM2_ESM.pdf/9601056)

**a**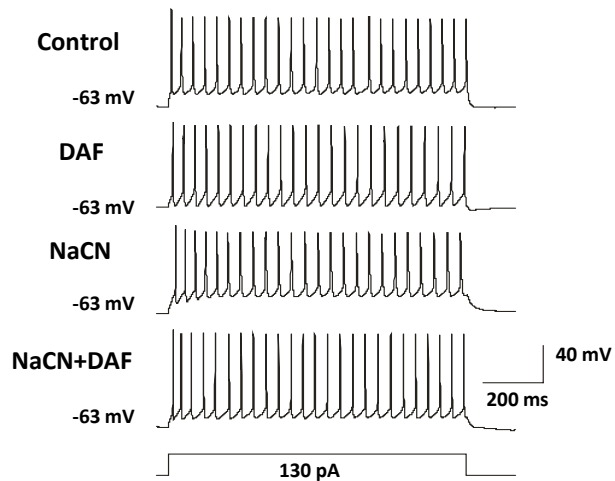**b**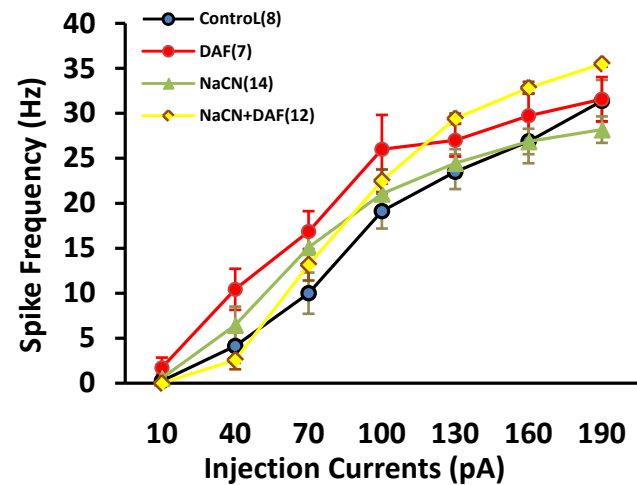**c**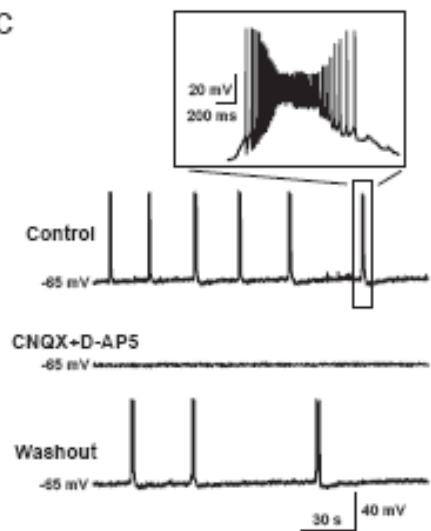**d**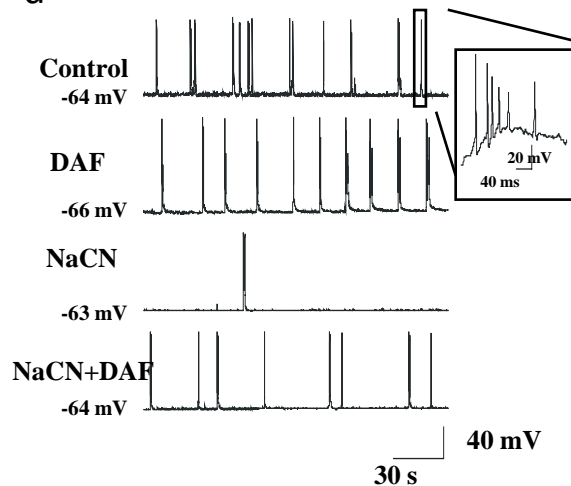**e**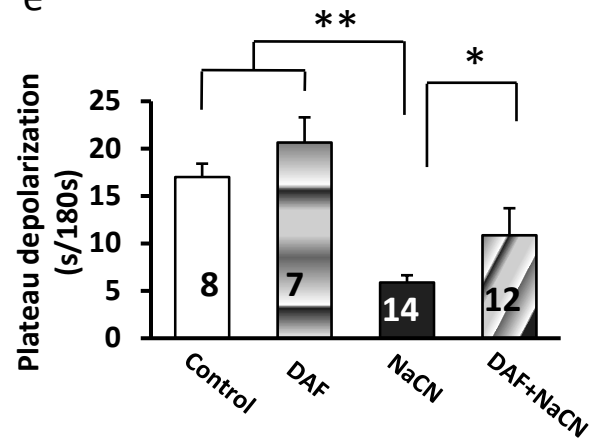

Supplement: MOESM2 [file 9601056]
